# Supplementary material for: Circ_0006332 promotes growth and progression of bladder cancer by modulating MYBL2 expression via miR-143
Source: publisher site journal article supplement (doi:10.18632/aging.102481), 2019-11-22
Supplement: Supplementary file [file aging-v11i22-102481-supplementary-material-SD1.pdf]

**SUPPLEMENTARY FIGURE**

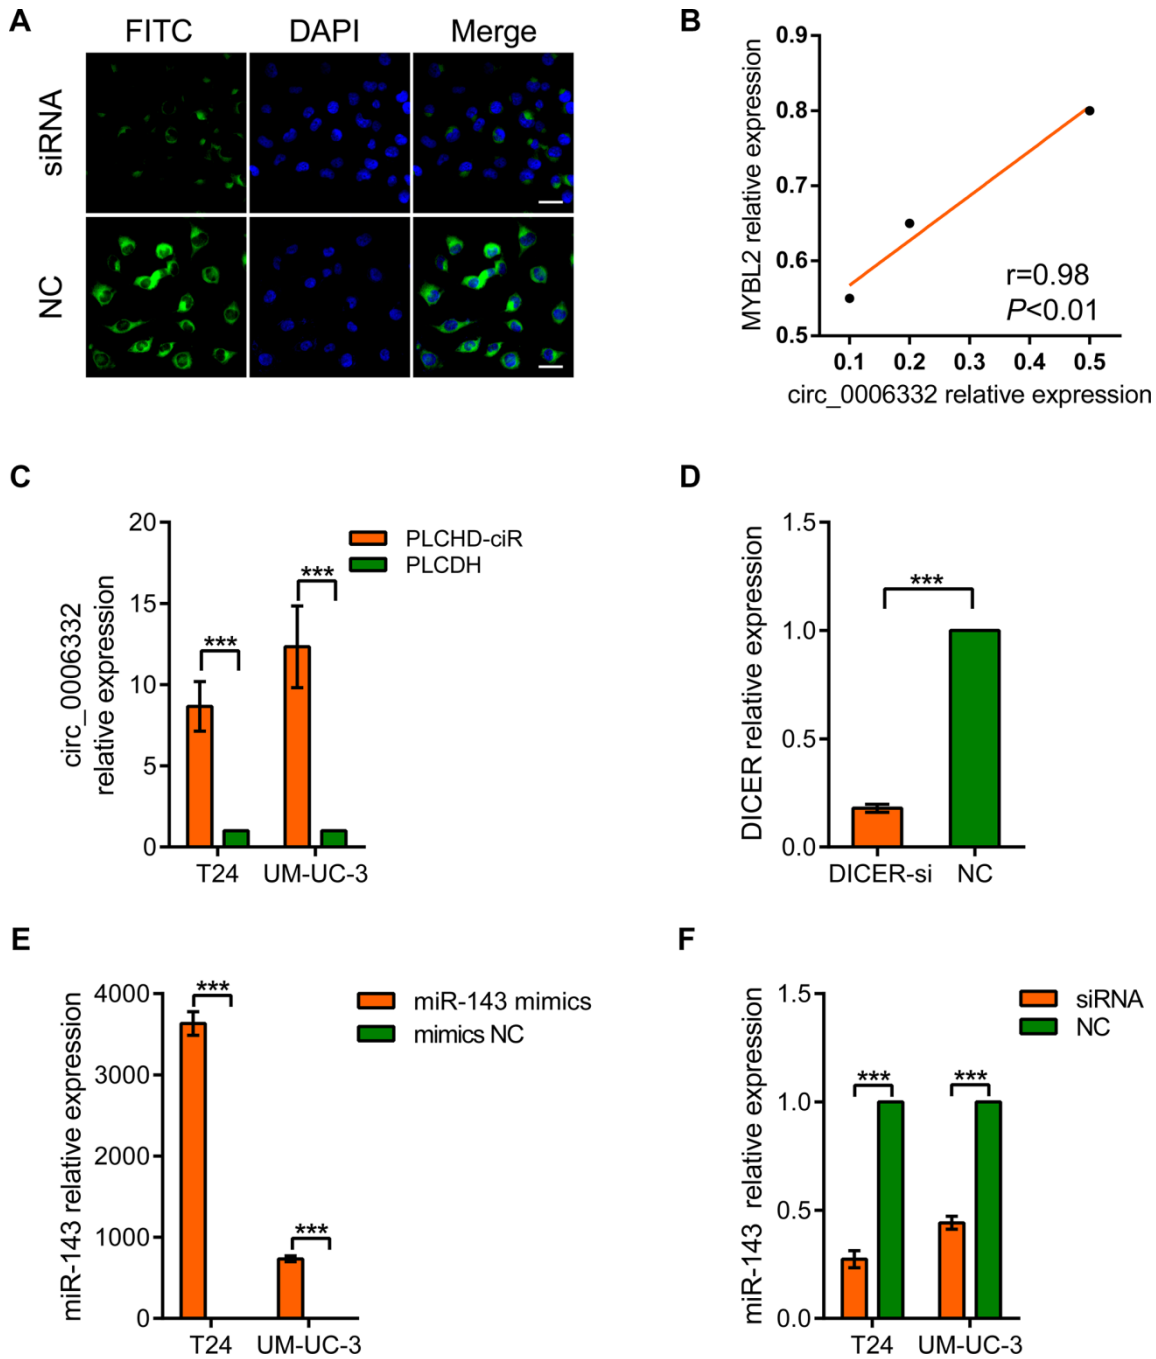

**Supplementary Figure 1. Circ\_0006332, DICER, and miR-143 levels in control and siRNA- or miRNA transfected bladder cancer cells.** (A) Representative FISH images show siRNA against circ\_0006332 decreases circ\_0006332 expression in T24 cell. Scale bar: 50  $\mu$ m. (B) Putative model shows probable mechanism of MYBL2 regulation by circ\_0006332. QRT-PCR shows that circ\_0006332 expression is inhibited by rates of 48%, 79% and 90% while MYBL2 expression is suppressed by rates of 19%, 25% and 36%. (C) Circ\_0006332 levels in bladder cancer cells transfected with PLCHD-ciR and control vectors. (D) siRNA against Dicer significantly reduces the expression of DICER compared with the controls in T24 cell. (E) MiR-143 mimics significantly increase the levels of miR-143 in the bladder cancer cells compared with the controls. (F) Circ\_0006332 knockdown decreases miR-143 levels compared with the controls. Note: All experiments were repeated thrice; data are represented as mean  $\pm$  SD; \*\*\* $P < 0.001$ .
