# Supplementary material for: Circ_0006332 promotes growth and progression of bladder cancer by modulating MYBL2 expression via miR-143
Source: publisher site journal article supplement (doi:10.18632/aging.102481), 2019-11-22
Supplement: Supplementary file [file aging-v11i22-102481-supplementary-material-SD2.pdf]

## SUPPLEMENTARY TABLES

**Supplementary Table 1. Information of selected circRNAs.**

| Gene name | Transcript Name | Biotype | Mapped circRNA ID | Exon/intron Count          | log <sub>2</sub> (Foldchange) | P value |
|-----------|-----------------|---------|-------------------|----------------------------|-------------------------------|---------|
| FLNA      | ENST00000610817 | ciRNA   | None              | 37                         | -3.59                         | 0.004   |
| KIAA1462  | ENST00000375377 | ciRNA   | hsa_circ_0018069  | 3                          | -2.27                         | 0.048   |
| TBX20     | ENST00000408931 | ciRNA   | None              | 6, 5, 4, 3, 2              | -2.21                         | 0.003   |
| AKAP6     | ENST00000280979 | ciRNA   | hsa_circ_0101667  | 3, 4, 5                    | -2.21                         | 0.012   |
| PGM5      | ENST00000396396 | ciRNA   | hsa_circ_0138896  | 2, 3, 4, 5, 6, 7, 8, 9, 10 | -1.99                         | 0.020   |
| TOX3      | ENST00000219746 | ciRNA   | hsa_circ_0039351  | 3, 2                       | 2.48                          | 0.030   |
| MOCOS     | ENST00000261326 | ciRNA   | hsa_circ_0003552  | 2, 3, 4, 5                 | 2.50                          | 0.001   |
| CCNB1     | ENST00000256442 | ciRNA   | hsa_circ_0001495  | 6, 7                       | 2.51                          | 0.002   |
| MYBL2     | ENST00000396863 | ciRNA   | hsa_circ_0006332  | 7, 8                       | 2.99                          | 0.047   |
| IGHG2     | TCONS_00034765  | ciRNA   | None              | 2                          | 4.07                          | 0.004   |

ciRNA: circulated by intron, circRNA: circulated by exon

**Supplementary Table 2. Wild and mutated type vector for circ\_0006332.**

|                     |    |                                         |    |     |
|---------------------|----|-----------------------------------------|----|-----|
| Position of 180-186 | 5' | ...CTGGATGGCCACAC <b>ACGGGTTG</b> ...   | 3' | Mut |
|                     | 5' | ...CTGGATGGCCACAC <b>CATCTCAG</b> ...   | 3' | Wt  |
| hsa-miR-143-3p      | 3' | CUCGAUGUCACGA <b>AGUAGAGU</b>           | 5' |     |
|                     |    |                                         |    |     |
| Position of 222-227 | 5' | ...GGCGAGCTGATCCC <b>ACGGGTC</b> ...    | 3' | Mut |
|                     | 5' | ...GGCGAGCTGATCCC <b>CATCTCC</b> ...    | 3' | Wt  |
| hsa-miR-143-3p      | 3' | CUCGAUGUCACGA <b>AGUAGAGU</b>           | 5' |     |
|                     |    |                                         |    |     |
| Position of 458-464 | 5' | ...CATTGGAGCTGGAGAA <b>AAAGGAAG</b> ... | 3' | Mut |
|                     | 5' | ...CATTGGAGCTGGAGAG <b>GCCCCTCG</b> ... | 3' | Wt  |
| hsa-miR-423-5p      | 3' | UUUCAGAGCGAGAGAG <b>CGGGGAGU</b>        | 5' |     |
|                     |    |                                         |    |     |
| Position of 343-349 | 5' | ...ACCAGTCTGTCCT <b>ATACAAA</b> ...     | 3' | Mut |
|                     | 5' | ...ACCAGTCTGTCCT <b>TCCTGGA</b> ...     | 3' | Wt  |
| hsa-miR-665         | 3' | UCCCCGGAGUCGG <b>AGGACCA</b>            | 5' |     |
|                     |    |                                         |    |     |
| Position of 382-395 | 5' | ...AGAGCACACCTGTT <b>ATCGAGGAG</b> ...  | 3' | Mut |
|                     | 5' | ...AGAGCACACCTGTT <b>AAGACCCTG</b> ...  | 3' | Wt  |
| hsa-miR-1182        | 3' | CAGUGUAGGGAGGG <b>UUCUGGGAG</b>         | 5' |     |
|                     |    |                                         |    |     |

Red nucleotides: predicted binding sites for miRNA and circ\_0006332

Blue nucleotides: mutation nucleotides, Mut: mutated type, Wt: wild type.

**Supplementary Table 3. Synthesized RNA sequence.**

---

|                               |                         |
|-------------------------------|-------------------------|
| Dicer siRNA                   | GGUGGUCUUAGACAGGUAUTT   |
| circ_0006332 siRNA            | GAAACAUGCUGCGACCCUGTT   |
| circ_0006332 siRNA-1          | GAAACAUGCUGCCUCCGGATT   |
| circ_0006332 siRNA-2          | CUAACGAAUGC GGACCCUGTT  |
| NC                            | UUCUCCGAACGUGUCACGUTT   |
| miR-143 mimics                | UGAGAUGAAGCACUGUAGCUC   |
| miR-143 inhibitor             | GAGCUACAGUGCUUCAUCUCA   |
| miR-423-5p mimics             | UGAGGGGCAGAGAGCGAGACUUU |
| miR-665 mimics                | ACCAGGAGGCUGAGGGCCCU    |
| miR-1182 mimics               | GAGGGUCUUGGGAGGGAUGUGAC |
| mimics NC                     | UUCUCCGAACGUGUCACGUTT   |
| inhibitor NC                  | CAGUACUUUUGUGUAGUACAA   |
| circ_0006332 Forward Primer   | ACCGGGACAAGACACCCC      |
| circ_0006332 Reverse Primer   | GCAGCTGCACTAGGCTGT      |
| MYBL2 Forward Primer          | GAGGGATAGCAAGTGCAAGGT   |
| MYBL2 Reverse Primer          | TTCCAGTCCTGCTGTCCAAA    |
| Dicer Forward Primer          | GTTTGAAAGCGTTGAGTGGTAT  |
| Dicer Reverse Primer          | GCCAGCTTCCTTTATCAATCTG  |
| $\beta$ -actin Forward Primer | GAGACCTTCAACACCCCAGCC   |
| $\beta$ -actin Reverse Primer | GGATCTTCATGAGGTAGTCAG   |
| GAPDH Forward Primer          | GGACCTGACCTGCCGTCTAG    |
| GAPDH Reverse Primer          | TAGCCCAGGATGCCCTTGAG    |
| miR-143-5p Forward Primer     | TGAGATGAAGCACTGTAGCTC   |
| miR-370-3p Forward Primer     | TTCCAGTCCTGCTGTCCAAA    |
| miR-423-5p Forward Primer     | TGAGGGGCAGAGCGAGACTTT   |
| miR-665 Forward Primer        | TCCCCGGAGTCGGAGGACCA    |
| miR-1182 Forward Primer       | CAGTGAGGGAGGGTTCTGGGAG  |
| U6 Forward Primer             | GCGCGTCGTGAAGCGTTC      |
| Common Reverse Primer         | GTGCAGGGTCCGAGGT        |

---
